# Supplementary material for: Rapid Hormetic Responses of Photosystem II Photochemistry of Clary Sage to Cadmium Exposure
Source: PubMed Central journal article supplement (PMC7793146; doi:10.3390/ijms22010041), 2020-12-22
Supplement: ijms-22-00041-s001.pdf [file ijms-22-00041-s001.pdf]

# Rapid Hormetic Responses of Photosystem II Photochemistry of Clary Sage to Cadmium Exposure

Ioannis-Dimosthenis S. Adamakis, Ilektra Sperdouli, Anetta Hanć, Anelia Dobrikova, Emilia Apostolova and Michael Moustakas

**Table S1.** Definitions of the five main chlorophyll fluorescence parameters measured by the *Imaging PAM M-Series* system (Heinz Walz Instruments, Effeltrich, Germany)

| Parameter        | Definition                                                                                                                                               | Measured                                                                                                                                                                                                       |
|------------------|----------------------------------------------------------------------------------------------------------------------------------------------------------|----------------------------------------------------------------------------------------------------------------------------------------------------------------------------------------------------------------|
| F <sub>o</sub>   | Minimum chlorophyll a fluorescence in the dark-adapted leaf, when the primary acceptor of PSII quinone A (QA) is maximally oxidized (PSII centers open)  | Obtained by modulated measuring light of 0.5 $\mu\text{mol photons m}^{-2} \text{s}^{-1}$                                                                                                                      |
| F <sub>m</sub>   | Maximum chlorophyll a fluorescence in the dark-adapted leaf, when the primary acceptor of PSII quinone A (QA) is maximally reduced (PSII centers closed) | Obtained with a saturating pulse (SP) of 6000 $\mu\text{mol photons m}^{-2} \text{s}^{-1}$                                                                                                                     |
| F <sub>s</sub>   | Steady-state photosynthesis                                                                                                                              | Measured after 5 min illumination time before switching off the actinic light (AL) of 220 $\mu\text{mol photons m}^{-2} \text{s}^{-1}$ or 900 $\mu\text{mol photons m}^{-2} \text{s}^{-1}$                     |
| F <sub>o</sub> ' | Maximum chlorophyll a fluorescence in the light-adapted leaf                                                                                             | It was computed by the Imaging Win software (Heinz Walz GmbH, Effeltrich, Germany) using the approximation of Oxborough and Baker (1997) $F_o' = F_o / (F_v / F_m + F_o / F_m')$                               |
| F <sub>m</sub> ' | Maximum chlorophyll a fluorescence in the light-adapted leaf                                                                                             | Measured with saturating pulses (SPs) every 20 s for 5 min after application of the actinic light (AL) of 220 $\mu\text{mol photons m}^{-2} \text{s}^{-1}$ or 900 $\mu\text{mol photons m}^{-2} \text{s}^{-1}$ |

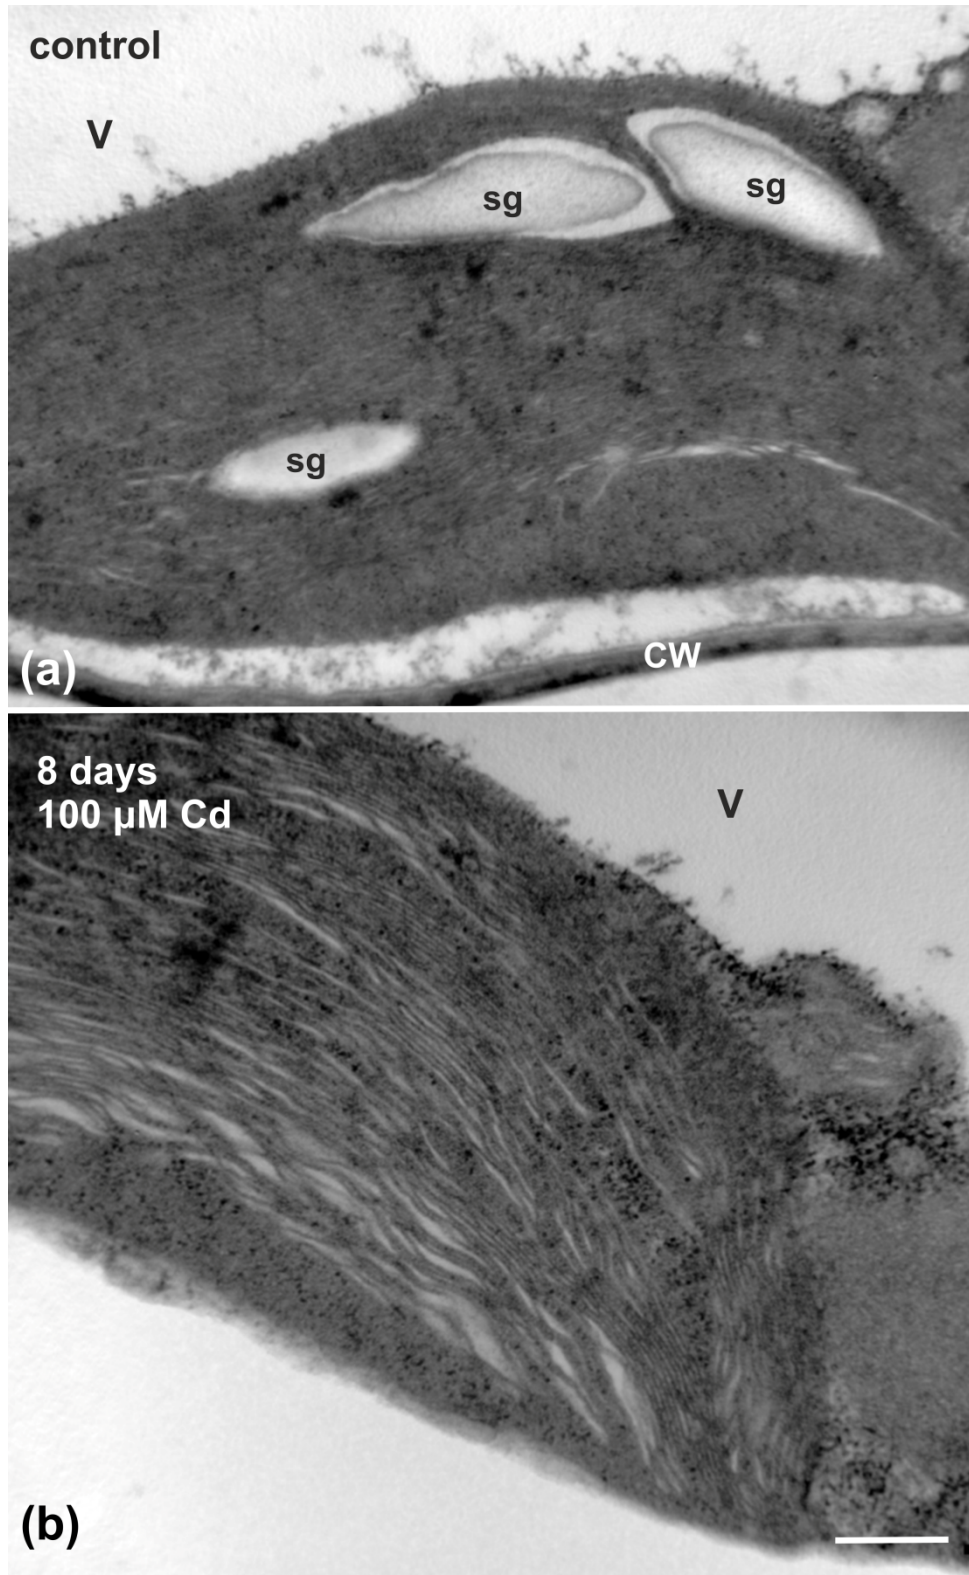

**Figure S1.** Transmission Electron Microscopy (TEM) images of control (untreated) chloroplasts (a) and 8-days Cd-treated (b) *Salvia sclarea* leaves. Chloroplasts appear electronically dense and upon Cd treatment with swollen thylakoids. cw: cell wall; sg: starch grain; v: vacuole. Scale bar: 500 nm.

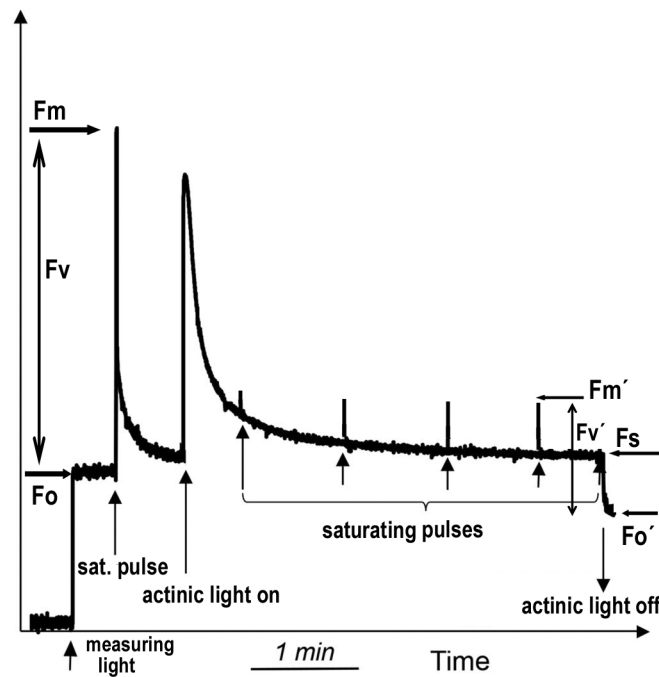

**Figure S2.** A typical modulated fluorescence trace of a dark-adapted leaf with  $F_o$ ,  $F_m$ ,  $F_o'$ ,  $F_m'$  and  $F_s$  measurements. In the dark-adapted state a low intensity “measuring light” is switched on to elicit the minimal level of chlorophyll fluorescence, termed  $F_o$ . A brief saturating pulse of light outcomes in the formation of the maximum yield of fluorescence,  $F_m$ . The difference between  $F_m$  and  $F_o$  is the variable fluorescence,  $F_v$ . The ratio  $F_v/F_m$  is the maximum quantum yield of PSII photochemistry. The application of saturating pulses under actinic light illumination closes all the reaction centers and provides the maximum fluorescence in the light-adapted state, termed  $F_m'$ . The steady-state level of fluorescence in the light is termed,  $F_s$  and is measured immediately before switching off the actinic light (Adopted from Moustakas et al. [*Plants* 2020, 9, 962]).
